# Supplementary material for: Seasonal Variation of Harbor Seal's Diet from the Wadden Sea in Relation to Prey Availability
Source: PubMed Central journal article supplement (PMC4866785; doi:10.1371/journal.pone.0155727), 2016-05-13
Supplement: pone.0155727.s002.pdf [file pone.0155727.s002.pdf]

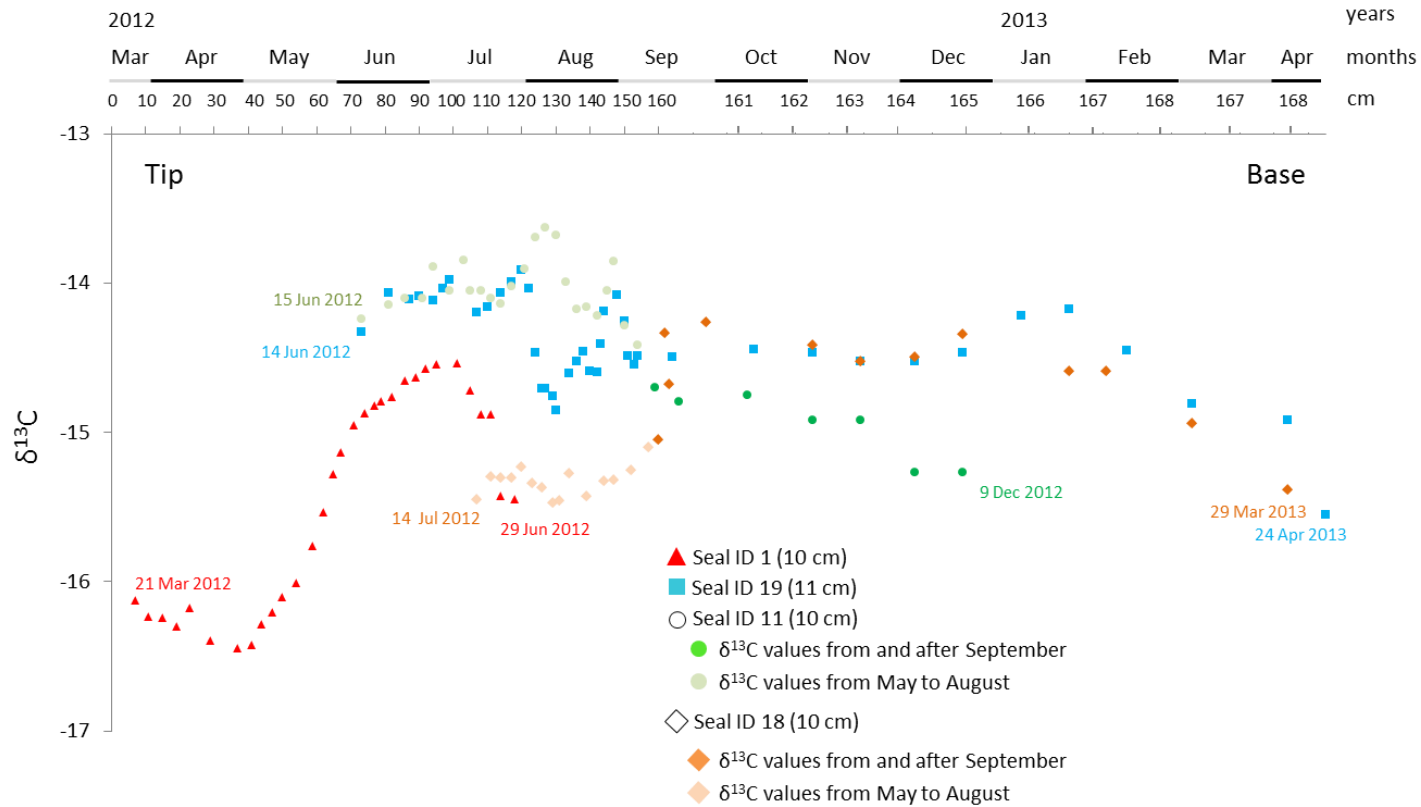

All vibrissae were treated in this manner for both Carbon and Nitrogen stable isotope ratios and were included in the moving mean for seasonal variation study.

*Correspondence Time/Length:* The growth rates used for reconstitution of temporal variation were  $0.78 \text{ mm.d}^{-1}$  from May to September, and  $0.075 \text{ mm.d}^{-1}$  from October to April [45].

*Young-of-the-year's data treatment:* the  $\delta^{13}\text{C}$  and  $\delta^{15}\text{N}$  values of young-of-the-year corresponding to May, June, July and August were not taking in account in the analyses for this study (S1 Table).
