# Supplementary material for: Seasonal Variation of Harbor Seal's Diet from the Wadden Sea in Relation to Prey Availability
Source: PubMed Central journal article supplement (PMC4866785; doi:10.1371/journal.pone.0155727), 2016-05-13
Supplement: pone.0155727.s003.pdf [file pone.0155727.s003.pdf]

| Months                                          | May                    | June               | July                              | August             | September          | October            | November           | December           |
|-------------------------------------------------|------------------------|--------------------|-----------------------------------|--------------------|--------------------|--------------------|--------------------|--------------------|
| Corresponding age of young-of-the-year (months) | <1                     | 0-1                | 1-2                               | 2-3                | 3-4                | 4-5                | 5-6                | 6-7                |
| <b><math>\delta^{15}\text{N}</math></b>         |                        |                    |                                   |                    |                    |                    |                    |                    |
| Adults                                          | <b>16.0 ± 0.1</b>      | <b>18.0 ± 1.1</b>  | <b>18.9 ± 1.4</b>                 | <b>19.8 ± 1.0</b>  | <b>19.1 ± 0.8</b>  | <b>19.0</b>        | <b>19.0</b>        | <b>19.4 ± 0.1</b>  |
| Young-of-the-year                               | 19.8 ± 0.8             | 19.7 ± 0.8         | 19.9 ± 0.8                        | 20.0 ± 0.9         | <b>19.3 ± 1.0</b>  | <b>18.8 ± 0.9</b>  | <b>19.3 ± 0.6</b>  | <b>19.2 ± 0.4</b>  |
| $\Delta\delta^{15}\text{N}$                     | 3.8                    | 1.7                | 1.0                               | 0.2                | 0.2                | 0.3                | 0.3                | 0.2                |
| Wilcoxon test p-value                           | 0.009 **               | 0.048 *            | 0.061 <sup>o</sup>                | 0.332              | 0.574              | -                  | -                  | 0.801              |
| <b><math>\delta^{13}\text{C}</math></b>         |                        |                    |                                   |                    |                    |                    |                    |                    |
| Adults                                          | <b>-16.6 ± 0.2</b>     | <b>-15.2 ± 1.2</b> | <b>-15.0 ± 1.1</b>                | <b>-14.4 ± 0.2</b> | <b>-14.9 ± 0.5</b> | <b>-14.5</b>       | <b>-14.5</b>       | <b>-14.2 ± 0.2</b> |
| Young-of-the-year                               | -14.9 ± 0.6            | -15.1 ± 0.6        | -15.0 ± 0.7                       | -14.8 ± 0.6        | <b>-15.0 ± 0.7</b> | <b>-14.9 ± 0.6</b> | <b>-15.0 ± 0.6</b> | <b>-15.1 ± 0.5</b> |
| $\Delta\delta^{13}\text{C}$                     | 1.7                    | 0.1                | 0.0                               | 0.4                | 0.1                | 0.4                | 0.5                | 0.8                |
| Wilcoxon test p-value                           | 0.009***               | 0.978              | 0.71                              | 0.551              | 0.813              | -                  | -                  | 0.133              |
| ** $\alpha$ risk < 0.01                         | * $\alpha$ risk < 0.05 |                    | <sup>o</sup> $\alpha$ risk < 0.10 |                    |                    |                    |                    |                    |
