# Supplementary material for: Seasonal Variation of Harbor Seal's Diet from the Wadden Sea in Relation to Prey Availability
Source: PubMed Central journal article supplement (PMC4866785; doi:10.1371/journal.pone.0155727), 2016-05-13
Supplement: pone.0155727.s004.pdf [file pone.0155727.s004.pdf]

| Sylt-Rømø Bight               |                               |             |            |                    | North Sea                     |                               |             |            |   |
|-------------------------------|-------------------------------|-------------|------------|--------------------|-------------------------------|-------------------------------|-------------|------------|---|
| trophic group                 | species                       | d13C (‰)    | d15N (‰)   | n                  | trophic group                 | species                       | d13C (‰)    | d15N (‰)   | n |
| planktivorous/<br>piscivorous | <i>Ammodytes tobianus</i>     | -19.0 ± 1.2 | 16.0 ± 0.9 | 38                 | planktivorous/<br>piscivorous | <i>Hyperoplus lanceolatus</i> | -19.8 ± 0.9 | 16.2 ± 0.1 | 3 |
|                               | <i>Belone belone</i>          | -17.0 ± 1.1 | 16.5 ± 0.6 | 7                  |                               | <i>Sprattus sprattus</i>      | -21.0 ± 2.2 | 15.2 ± 0.1 | 2 |
|                               | <i>Clupea harengus</i>        | -18.8 ± 0.4 | 16.0 ± 0.7 | 54                 | Benthivorous/<br>piscivorous  | <i>Ciliata mustela</i>        | -18.2 ± 0.4 | 17.6 ± 0.6 | 2 |
|                               | <i>Hyperoplus lanceolatus</i> | -18.4 ± 1.6 | 16.0 ± 1.3 | 14                 |                               | <i>Gadus morhua</i>           | -18.4 ± 0.5 | 17.7 ± 0.3 | 3 |
|                               | <i>Sprattus sprattus</i>      | -18.3 ± 1.9 | 15.8 ± 1.1 | 28                 |                               | <i>Limanda limanda</i>        | -20.0 ± 1.0 | 15.6 ± 0.2 | 6 |
| Benthivorous/<br>piscivorous  | <i>Gasterosteus aculeatus</i> | -18.9 ± 1.4 | 16.9 ± 0.6 | 9                  | <i>Merlangius merlangus</i>   | -18.4 ± 1.3                   | 16.9 ± 0.4  | 12         |   |
|                               | <i>Limanda limanda</i>        | -16.9 ± 0.6 | 16.6 ± 1.0 | 18                 | <i>Agonus cataphractus</i>    | -16.8 ± 0.1                   | 17.4 ± 0.2  | 3          |   |
|                               | <i>Merlangius merlangus</i>   | -17.1 ± 1.9 | 16.8 ± 1.3 | 36                 | <i>Crangon crangon</i>        | -17.3 ± 2.2                   | 16.2 ± 0.7  | 6          |   |
|                               | <i>Myoxocephalus scorpius</i> | -15.6 ± 0.6 | 17.1 ± 1.0 | 17                 | Strictly<br>benthivorous      | <i>Pomatoschistus microps</i> | -19.1       | 15.0       | 1 |
|                               | <i>Platichthys flesus</i>     | -16.2 ± 1.3 | 16.2 ± 1.7 | 8                  |                               | <i>Pomatoschistus minutus</i> | -17.9 ± 0.2 | 16.3 ± 0.1 | 5 |
|                               | <i>Syngnathus rostellatus</i> | -17.6 ± 1.0 | 16.8 ± 0.6 | 30                 |                               | <i>Pleuronectes platessa</i>  | -19.9 ± 0.9 | 14.7 ± 0.7 | 6 |
| <i>Agonus cataphractus</i>    | -15.9 ± 1.6                   | 17.2 ± 0.9  | 19         | <i>Solea solea</i> |                               | -18.5 ± 0.7                   | 16.4 ± 0.8  | 3          |   |
| Strictly<br>benthivorous      | <i>Crangon crangon</i>        | -16.1 ± 1.2 | 16.1 ± 1.3 | 9                  | <i>Zoarces viviparus</i>      | -17.8 ± 0.6                   | 16.8 ± 0.5  | 9          |   |
|                               | <i>Pholis gunnellus</i>       | -16.6 ± 2.8 | 17.0 ± 1.0 | 9                  |                               |                               |             |            |   |
|                               | <i>Pomatoschistus microps</i> | -14.1 ± 1.6 | 17.0 ± 1.0 | 21                 |                               |                               |             |            |   |
|                               | <i>Pomatoschistus minutus</i> | -16.9 ± 1.0 | 16.5 ± 0.4 | 42                 |                               |                               |             |            |   |
|                               | <i>Pleuronectes platessa</i>  | -15.7 ± 1.8 | 15.8 ± 0.5 | 61                 |                               |                               |             |            |   |
|                               | <i>Zoarces viviparus</i>      | -15.6 ± 1.6 | 16.7 ± 0.6 | 16                 |                               |                               |             |            |   |
|                               | <i>loligo sp.</i>             | -19.0 ± 0.8 | 14.0 ± 1.0 | 15                 |                               |                               |             |            |   |
| <i>Osmerus eperlanus</i>      | -16.5 ± 0.9                   | 17.4 ± 0.7  | 20         |                    |                               |                               |             |            |   |
